# Supplementary material
Source: publisher figshare collection journal article supplement (https://tandf.figshare.com/articles/dataset/_/1626624)
Supplement: Supplementary file 1 [file 1]

Supplementary Material for Luymes CH et al. Change in calculated cardiovascular risk due to guideline revision: A cross-sectional study in the Netherlands. Eur J Gen Pract, 2015; doi: 10.3109/13814788.2015.1064389.

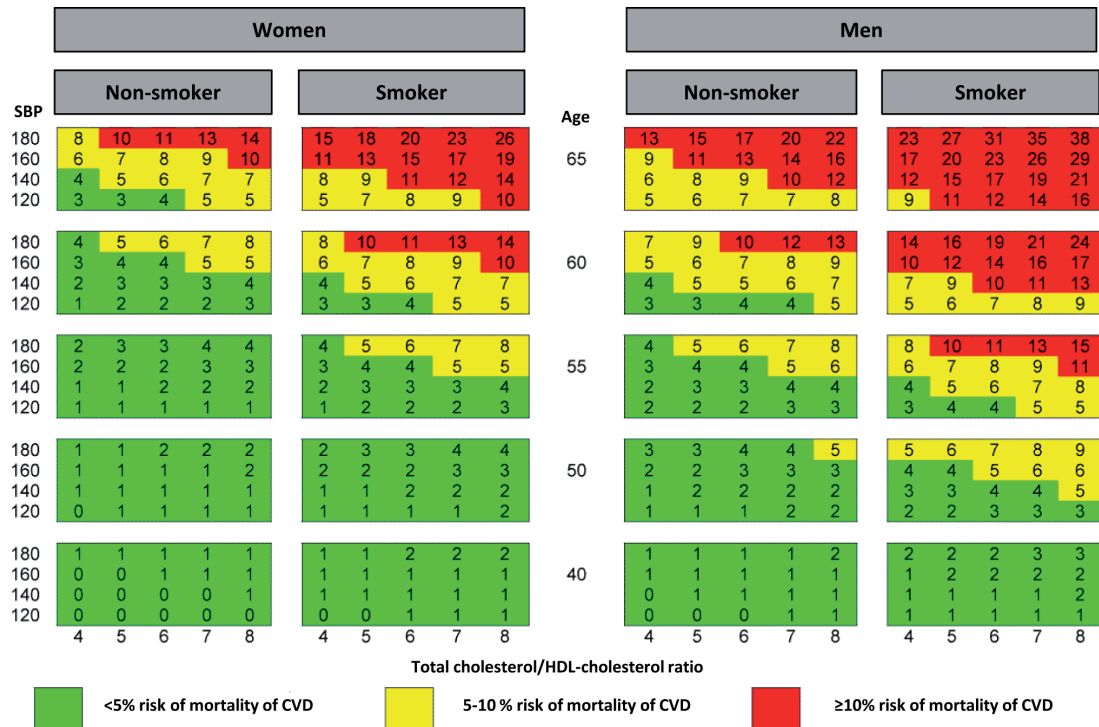

Supplementary Appendix Figure 1. Risk chart of the Dutch 2006 guideline on cardiovascular risk management (18).
