# Supplementary material
Source: publisher figshare collection journal article supplement (https://tandf.figshare.com/articles/dataset/_/1626624)
Supplement: Supplementary file 2 [file 1]

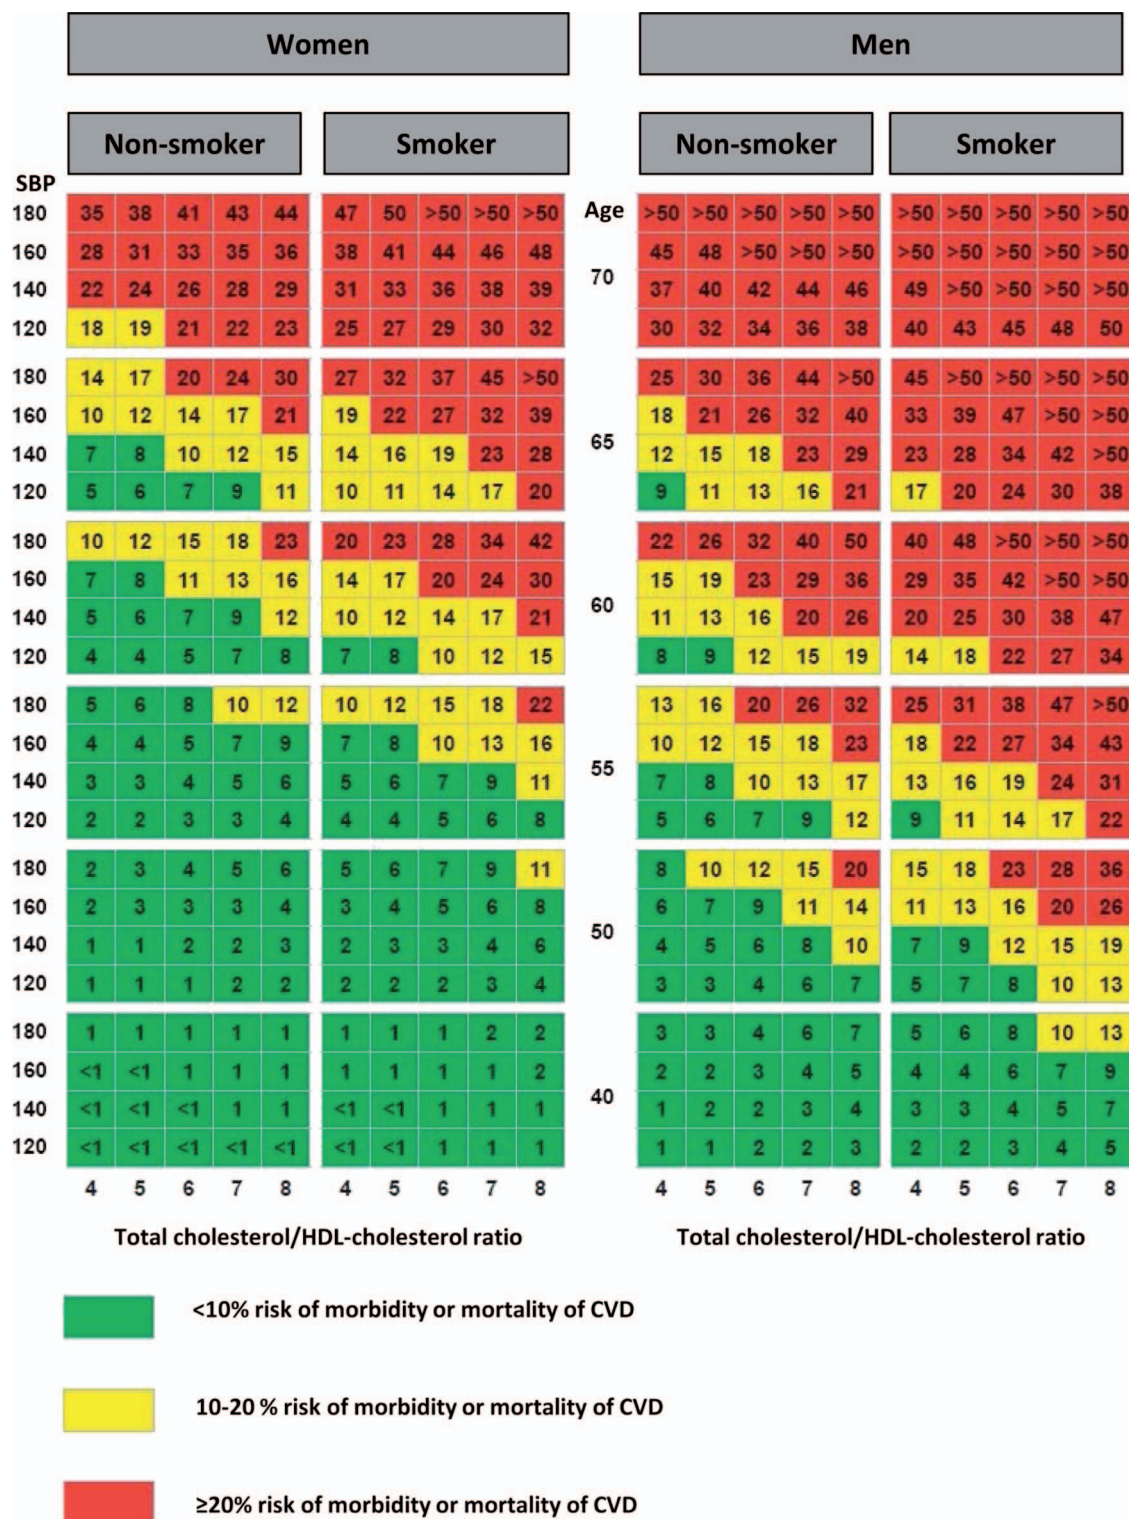

Supplementary Appendix Figure 2. Risk chart of the Dutch 2012 guideline on cardiovascular risk management (20).
