# Supplementary material
Source: publisher figshare collection journal article supplement (https://tandf.figshare.com/articles/dataset/_/1626624)
Supplement: Supplementary file 3 [file 1]

Archive with 2 entries (2 files):
- igen_a_1064389_sm3816.pdf
- igen_a_1064389_sm3818.pdf
